# Supplementary material for: Neurodegeneration and contralateral α-synuclein induction after intracerebral α-synuclein injections in the anterior olfactory nucleus of a Parkinson’s disease A53T mouse model
Source: PubMed Central journal article supplement (PMC6463651; doi:10.1186/s40478-019-0713-7), 2019-04-15
Supplement: 40478_2019_713_MOESM1_ESM.pdf [file 40478_2019_713_MOESM1_ESM.pdf]

## ADDITIONAL FILE 1

### Neurodegeneration and contralateral $\alpha$ -synuclein induction after intracerebral $\alpha$ -synuclein injections in the anterior olfactory nucleus of a Parkinson's disease A53T mouse model

Alicia Flores-Cuadrado<sup>1</sup>, Daniel Saiz-Sanchez<sup>1</sup>, Alicia Mohedano-Moriano<sup>2</sup>, Alino Martinez-Marcos<sup>1</sup>,  
Isabel Ubeda-Bañon<sup>1\*</sup>

<sup>1</sup>Neuroplasticity and Neurodegeneration Laboratory, CRIB, Ciudad Real Medical School, University of Castilla-La Mancha, Ciudad Real, Spain.

<sup>2</sup>School of Occupational Therapy, Speech Therapy and Nursing, University of Castilla-La Mancha, Talavera de la Reina, Spain.

[Alicia.flores@uclm.es](mailto:Alicia.flores@uclm.es)

[Daniel.saiz@uclm.es](mailto:Daniel.saiz@uclm.es)

[Alicia.mohedano@uclm.es](mailto:Alicia.mohedano@uclm.es)

[Alino.martinez@uclm.es](mailto:Alino.martinez@uclm.es)

#### Address for correspondence:

Isabel Ubeda-Bañon

University of Castilla-La Mancha

Ciudad Real Medical School

Camino de Moledores s/n

13071 Ciudad Real (Spain)

Phone: 926295300 6835

E-mail [Isabel.ubeda@uclm.es](mailto:Isabel.ubeda@uclm.es)

## Material and methods

**Table S1.** Antibodies

| Antigen                    | Manufacturer, cat n <sup>o</sup> , species                     | Dilution | Secondary antibodies                                               |
|----------------------------|----------------------------------------------------------------|----------|--------------------------------------------------------------------|
| $\alpha$ -synuclein (KM51) | Novocastra <sup>TM</sup> (Leica Biosystems), NCL-L-ASYN, mouse | 1:50     | 1:200 biotinylated horse anti-mouse IgG (H+L) Vector laboratories  |
| Iba-1                      | Wako, 019-19741, rabbit                                        | 1:500    | 1:200 biotinylated horse anti-rabbit IgG (H+L) Vector laboratories |
| GFAP                       | BD Pharmingen <sup>TM</sup> , 556329, mouse                    | 1:5000   | 1:200 biotinylated horse anti-mouse IgG (H+L) Vector laboratories  |
| NeuN                       | Abcam ab104225, rabbit                                         | 1:1000   | 1:200 biotinylated horse anti-rabbit IgG (H+L) Vector laboratories |

**Table S2.** Parameters of unbiased, design-based stereology

| Area | Counting frame $\alpha$ -synuclein ( $\mu\text{m} \times \mu\text{m}$ ) | Counting frame Iba-1 ( $\mu\text{m} \times \mu\text{m}$ ) | Counting frame NeuN ( $\mu\text{m} \times \mu\text{m}$ ) | Grid size $\alpha$ -synuclein ( $\mu\text{m} \times \mu\text{m}$ ) | Grid size NeuN ( $\mu\text{m} \times \mu\text{m}$ ) | Grid size Iba-1 ( $\mu\text{m} \times \mu\text{m}$ ) |
|------|-------------------------------------------------------------------------|-----------------------------------------------------------|----------------------------------------------------------|--------------------------------------------------------------------|-----------------------------------------------------|------------------------------------------------------|
| OB   | 7 x 7                                                                   | –                                                         | 20 x 20                                                  | 200 x 200                                                          | 233 x 484                                           | –                                                    |
| GL   | –                                                                       | 50 x 50                                                   | -                                                        | –                                                                  | -                                                   | 8 x 8                                                |
| EPL  | –                                                                       | 50 x 50                                                   | -                                                        | –                                                                  | -                                                   | 8 x 8                                                |
| IPL  | –                                                                       | 50 x 50                                                   | -                                                        | –                                                                  | -                                                   | 20 x 20                                              |
| MiL  | –                                                                       | 50 x 50                                                   | -                                                        | –                                                                  | -                                                   | 20 x 20                                              |
| GrL  | –                                                                       | 50 x 50                                                   | -                                                        | –                                                                  | -                                                   | 8 x 8                                                |
| AON  | 7 x 7                                                                   | 50 x 50                                                   | 20 x 20                                                  | 200 x 200                                                          | 122 x 221                                           | 5 x 5                                                |
| Pir  | 7 x 7                                                                   | 50 x 50                                                   | 20 x 20                                                  | 200 x 200                                                          | 233 x 484                                           | 5 x 5                                                |
