# Supplementary material for: Neurodegeneration and contralateral α-synuclein induction after intracerebral α-synuclein injections in the anterior olfactory nucleus of a Parkinson’s disease A53T mouse model
Source: PubMed Central journal article supplement (PMC6463651; doi:10.1186/s40478-019-0713-7), 2019-04-15
Supplement: 40478_2019_713_MOESM3_ESM.pdf [file 40478_2019_713_MOESM3_ESM.pdf]

## ADDITIONAL FILE 3

### **Neurodegeneration and contralateral $\alpha$ -synuclein induction after intracerebral $\alpha$ -synuclein injections in the anterior olfactory nucleus of a Parkinson's disease A53T mouse model**

Alicia Flores-Cuadrado<sup>1</sup>, Daniel Saiz-Sanchez<sup>1</sup>, Alicia Mohedano-Moriano<sup>2</sup>, Alino Martinez-Marcos<sup>1</sup>,  
Isabel Ubeda-Bañon<sup>1\*</sup>

<sup>1</sup>Neuroplasticity and Neurodegeneration Laboratory, CRIB, Ciudad Real Medical School, University of Castilla-La Mancha, Ciudad Real, Spain.

<sup>2</sup>School of Occupational Therapy, Speech Therapy and Nursing, University of Castilla-La Mancha, Talavera de la Reina, Spain.

[Alicia.flores@uclm.es](mailto:Alicia.flores@uclm.es)

[Daniel.saiz@uclm.es](mailto:Daniel.saiz@uclm.es)

[Alicia.mohedano@uclm.es](mailto:Alicia.mohedano@uclm.es)

[Alino.martinez@uclm.es](mailto:Alino.martinez@uclm.es)

#### **Address for correspondence:**

Isabel Ubeda-Bañon

University of Castilla-La Mancha

Ciudad Real Medical School

Camino de Moledores s/n

13071 Ciudad Real (Spain)

Phone: 926295300 6835

E-mail [Isabel.ubeda@uclm.es](mailto:Isabel.ubeda@uclm.es)

## Brain volume

**Table S3** Brain volume. Estimated volume of OB and layers (GL, EPL, MiL, IPL and GrL), AON and Pir (mm<sup>3</sup>). Statistical analysis was focused on comparisons: genotype in the right hemisphere, left hemisphere, interhemispheric differences in WT and TG. For statistical data, see tables S4–S7. For abbreviations, see list.

| Brain volume (mm <sup>3</sup> ). |          |                     |                  |                               |                  |                               |
|----------------------------------|----------|---------------------|------------------|-------------------------------|------------------|-------------------------------|
| Brain region                     | Genotype | Post-injection time | Right hemisphere |                               | Left hemisphere  |                               |
|                                  |          |                     | Treatment        |                               | Treatment        |                               |
|                                  |          |                     | Saline-injection | $\alpha$ -synuclein-injection | Saline-injection | $\alpha$ -synuclein-injection |
| GL                               | WT       | 2m                  | 1.266 ± 0.16240  | 1.429 ± 0.21380               | 1.079 ± 0.1874   | 1.707 ± 0.1439                |
|                                  |          | 4m                  | 1.331 ± 0.03881  | 1.366 ± 0.08751               | 1.296 ± 0.1084   | 1.330 ± 0.0528                |
|                                  | TG       | 2m                  | 1.531 ± 0.101    | 1.879 ± 1.030                 | 1.677 ± 0.092    | 1.649 ± 0.275                 |
| EPL                              | WT       | 2m                  | 2.036 ± 0.47050  | 1.461 ± 0.42040               | 1.507 ± 0.204    | 1.979 ± 0.075                 |
|                                  |          | 4m                  | 1.513 ± 0.02033  | 1.845 ± 0.27060               | 1.479 ± 0.108    | 1.821 ± 0.182                 |
|                                  | TG       | 2m                  | 2.212 ± 0.173    | 1.741 ± 0.517                 | 2.076 ± 0.097    | 1.886 ± 0.691                 |
| MiL                              | WT       | 2m                  | 0.6628 ± 0.3200  | 0.3823 ± 0.0618               | 0.5561 ± 0.25680 | 0.4575 ± 0.02483              |
|                                  |          | 4m                  | 0.5617 ± 0.2111  | 0.6692 ± 0.3375               | 0.4080 ± 0.09933 | 0.5087 ± 0.17860              |
|                                  | TG       | 2m                  | 0.4404 ± 0.0128  | 1.0520 ± 0.4581               | 0.4541 ± 0.0263  | 0.7220 ± 0.1527               |
| IPL                              | WT       | 2m                  | 0.5496 ± 0.26080 | 0.8661 ± 0.58200              | 0.2748 ± 0.02186 | 0.3440 ± 0.02245              |
|                                  |          | 4m                  | 0.2705 ± 0.01046 | 0.5900 ± 0.30690              | 0.2503 ± 0.01836 | 0.5450 ± 0.18600              |
|                                  | TG       | 2m                  | 0.3313 ± 0.0177  | 0.7728 ± 0.3827               | 0.4943 ± 0.2031  | 1.5640 ± 0.6492               |
| GrL                              | WT       | 2m                  | 2.480 ± 0.31330  | 2.081 ± 0.39640               | 2.315 ± 0.3042   | 2.713 ± 0.1151                |
|                                  |          | 4m                  | 2.045 ± 0.04228  | 2.048 ± 0.14200               | 1.999 ± 0.1459   | 2.152 ± 0.1120                |
|                                  | TG       | 2m                  | 2.082 ± 0.164    | 1.850 ± 0.539                 | 2.034 ± 0.103    | 2.078 ± 0.338                 |
| OB                               | WT       | 2m                  | 6.777 ± 0.7947   | 5.319 ± 0.9610                | 5.624 ± 0.8263   | 7.075 ± 0.5384                |
|                                  |          | 4m                  | 5.476 ± 0.1643   | 5.867 ± 0.2115                | 5.603 ± 0.1494   | 5.375 ± 0.6235                |
|                                  | TG       | 2m                  | 6.664 ± 0.271    | 7.619 ± 0.465                 | 6.416 ± 0.166    | 6.906 ± 0.254                 |
| AON                              | WT       | 2m                  | 1.4140 ± 0.19500 | 1.9620 ± 0.30250              | 1.4110 ± 0.24660 | 1.4240 ± 0.17510              |
|                                  |          | 4m                  | 1.3340 ± 0.10540 | 1.1830 ± 0.09017              | 1.2420 ± 0.07154 | 1.2480 ± 0.06981              |
|                                  | TG       | 2m                  | 1.4080 ± 0.0741  | 0.9065 ± 0.3043               | 1.358 ± 0.239    | 1.795 ± 0.391                 |
| Pir                              | WT       | 2m                  | 3.3170 ± 0.1805  | 2.9090 ± 0.2370               | 3.5160 ± 0.1474  | 3.1360 ± 0.2130               |
|                                  |          | 4m                  | 2.6530 ± 0.1506  | 3.0530 ± 0.1288               | 2.9120 ± 0.2310  | 3.3500 ± 0.1018               |
|                                  | TG       | 2m                  | 3.7330 ± 0.1305  | 3.0950 ± 0.6904               | 3.66400 ± 0.1970 | 3.52700 ± 0.44470             |

**Table S4.** Volume statistical data. Comparison of genotype in the right hemisphere.

| Area | Source of variation | F (DFn, DFd)        | P value     |
|------|---------------------|---------------------|-------------|
| GL   | Interaction         | F (1, 11) = 0.04726 | P = 0.8319  |
|      | Treatment           | F (1, 11) = 0.3606  | P = 0.5604  |
|      | Genotype            | F (1, 11) = 0.7059  | P = 0.4187  |
| EPL  | Interaction         | F (1, 11) = 0.01629 | P = 0.9007  |
|      | Treatment           | F (1, 11) = 1.648   | P = 0.2256  |
|      | Genotype            | F (1, 11) = 0.3132  | P = 0.5869  |
| MiL  | Interaction         | F (1, 11) = 3.187   | P = 0.1018  |
|      | Treatment           | F (1, 11) = 0.4390  | P = 0.5213  |
|      | Genotype            | F (1, 11) = 0.8012  | P = 0.3899  |
| IPL  | Interaction         | F (1, 11) = 0.02753 | P = 0.8712  |
|      | Treatment           | F (1, 11) = 1.012   | P = 0.3360  |
|      | Genotype            | F (1, 11) = 0.1711  | P = 0.6871  |
| GrL  | Interaction         | F (1, 11) = 0.05523 | P = 0.8185  |
|      | Treatment           | F (1, 11) = 0.7884  | P = 0.3936  |
|      | Genotype            | F (1, 11) = 0.7834  | P = 0.3950  |
| OB   | Interaction         | F (1, 11) = 2.837   | P = 0.1202  |
|      | Treatment           | F (1, 11) = 0.1233  | P = 0.7321  |
|      | Genotype            | F (1, 11) = 2.331   | P = 0.1551  |
| AON  | Interaction         | F (1, 11) = 5.140   | P = 0.0445* |
|      | Treatment           | F (1, 11) = 0.01009 | P = 0.9218  |
|      | Genotype            | F (1, 11) = 5.258   | P = 0.0425* |
| Pir  | Interaction         | F (1, 11) = 0.1301  | P = 0.7252  |
|      | Treatment           | F (1, 11) = 2.690   | P = 0.1292  |
|      | Genotype            | F (1, 11) = 0.8912  | P = 0.3654  |

**Table S5.** Volume statistical data. Comparison of genotype in the left hemisphere.

| Area | Source of variation | F (DFn, DFd)       | P value     |
|------|---------------------|--------------------|-------------|
| GL   | Interaction         | F (1, 11) = 3.564  | P = 0.0857  |
|      | Treatment           | F (1, 11) = 2.982  | P = 0.1121  |
|      | Genotype            | F (1, 11) = 2.415  | P = 0.1484  |
| EPL  | Interaction         | F (1, 11) = 1.257  | P = 0.2862  |
|      | Treatment           | F (1, 11) = 0.2280 | P = 0.6423  |
|      | Genotype            | F (1, 11) = 0.6497 | P = 0.4373  |
| MiL  | Interaction         | F (1, 11) = 1.440  | P = 0.2553  |
|      | Treatment           | F (1, 11) = 0.3073 | P = 0.5904  |
|      | Genotype            | F (1, 11) = 0.2831 | P = 0.6052  |
| IPL  | Interaction         | F (1, 11) = 2.797  | P = 0.1226  |
|      | Treatment           | F (1, 11) = 3.624  | P = 0.0834  |
|      | Genotype            | F (1, 11) = 5.789  | P = 0.0349* |
| GrL  | Interaction         | F (1, 11) = 0.6114 | P = 0.4508  |
|      | Treatment           | F (1, 11) = 0.9532 | P = 0.3499  |
|      | Genotype            | F (1, 11) = 4.094  | P = 0.0680  |
| OB   | Interaction         | F (1, 11) = 0.7569 | P = 0.4029  |
|      | Treatment           | F (1, 11) = 3.088  | P = 0.1067  |
|      | Genotype            | F (1, 11) = 0.3181 | P = 0.5841  |
| AON  | Interaction         | F (1, 11) = 0.6770 | P = 0.4281  |
|      | Treatment           | F (1, 11) = 0.7626 | P = 0.4012  |
|      | Genotype            | F (1, 11) = 0.3808 | P = 0.5497  |
| Pir  | Interaction         | F (1, 11) = 0.2440 | P = 0.6311  |
|      | Treatment           | F (1, 11) = 1.104  | P = 0.3158  |
|      | Genotype            | F (1, 11) = 1.200  | P = 0.2966  |

**Table S6.** Volume statistical data. Comparison of hemispheres in WT.

| Area | Source of variation | F (DFn, DFd)         | P value          |
|------|---------------------|----------------------|------------------|
| GL   | Interaction         | F (3, 26) = 1.100    | P = 0.3671       |
|      | Treatment           | F (3, 26) = 3.082    | P = 0.0448*      |
|      | Hemisphere          | F (1, 26) = 0.002876 | P = 0.9576       |
| EPL  | Interaction         | F (3, 26) = 1.315    | P = 0.2909       |
|      | Treatment           | F (3, 26) = 0.6201   | P = 0.6083       |
|      | Hemisphere          | F (1, 26) = 0.008555 | P = 0.9270       |
| MiL  | Interaction         | F (3, 26) = 0.1182   | P = 0.9486       |
|      | Treatment           | F (3, 26) = 0.3088   | P = 0.8188       |
|      | Hemisphere          | F (1, 26) = 0.2898   | P = 0.5949       |
| IPL  | Interaction         | F (3, 26) = 0.4022   | P = 0.7526       |
|      | Treatment           | F (3, 26) = 0.7296   | P = 0.5437       |
|      | Hemisphere          | F (1, 26) = 1.361    | P = 0.2540       |
| GrL  | Interaction         | F (3, 26) = 1.285    | P = 0.3004       |
|      | Treatment           | F (3, 26) = 1.610    | P = 0.2112       |
|      | Hemisphere          | F (1, 26) = 0.7165   | P = 0.4050       |
| OB   | Interaction         | F (3, 26) = 2.146    | P = 0.1187       |
|      | Treatment           | F (3, 26) = 0.7113   | P = 0.5541       |
|      | Hemisphere          | F (1, 26) = 0.01958  | P = 0.8898       |
| AON  | Interaction         | F (3, 26) = 1.301    | P = 0.2953       |
|      | Treatment           | F (3, 26) = 3.114    | P = 0.0434*      |
|      | Hemisphere          | F (1, 26) = 1.421    | P = 0.2440       |
| Pir  | Interaction         | F (3, 26) = 0.02933  | P = 0.9931       |
|      | Treatment           | F (3, 26) = 4.771    | P = 0.0088** (t) |
|      | Hemisphere          | F (1, 26) = 3.973    | P = 0.0568       |

(t) WT saline 2 months–WT saline 4 months:  $t_6 = 2.825$ ;  $P = 0.0302$ .

**Table S7.** Volume statistical data. Comparison of hemispheres in TG.

| Area | Source of variation | F (DFn, DFd)          | P value     |
|------|---------------------|-----------------------|-------------|
| GL   | Interaction         | F (1, 10) = 0.1720    | P = 0.6871  |
|      | Treatment           | F (1, 10) = 0.1246    | P = 0.7314  |
|      | Hemisphere          | F (1, 10) = 0.008586  | P = 0.9280  |
| EPL  | Interaction         | F (1, 10) = 0.1370    | P = 0.7190  |
|      | Treatment           | F (1, 10) = 0.7583    | P = 0.4043  |
|      | Hemisphere          | F (1, 10) = 0.0001406 | P = 0.9908  |
| MiL  | Interaction         | F (1, 10) = 0.7184    | P = 0.4165  |
|      | Treatment           | F (1, 10) = 4.704     | P = 0.0553  |
|      | Hemisphere          | F (1, 10) = 0.6085    | P = 0.4534  |
| IPL  | Interaction         | F (1, 10) = 0.8659    | P = 0.3740  |
|      | Treatment           | F (1, 10) = 5.011     | P = 0.0491* |
|      | Hemisphere          | F (1, 10) = 1.998     | P = 0.1879  |
| GrL  | Interaction         | F (1, 10) = 0.2270    | P = 0.6440  |
|      | Treatment           | F (1, 10) = 0.1053    | P = 0.7522  |
|      | Hemisphere          | F (1, 10) = 0.09657   | P = 0.7624  |
| OB   | Interaction         | F (1, 10) = 0.6403    | P = 0.4422  |
|      | Treatment           | F (1, 10) = 6.183     | P = 0.0322* |
|      | Hemisphere          | F (1, 10) = 2.735     | P = 0.1292  |
| AON  | Interaction         | F (1, 10) = 3.401     | P = 0.0950  |
|      | Treatment           | F (1, 10) = 0.01606   | P = 0.9017  |
|      | Hemisphere          | F (1, 10) = 2.715     | P = 0.1304  |
| Pir  | Interaction         | F (1, 10) = 0.4561    | P = 0.5147  |
|      | Treatment           | F (1, 10) = 1.092     | P = 0.3207  |
|      | Hemisphere          | F (1, 10) = 0.2395    | P = 0.6351  |

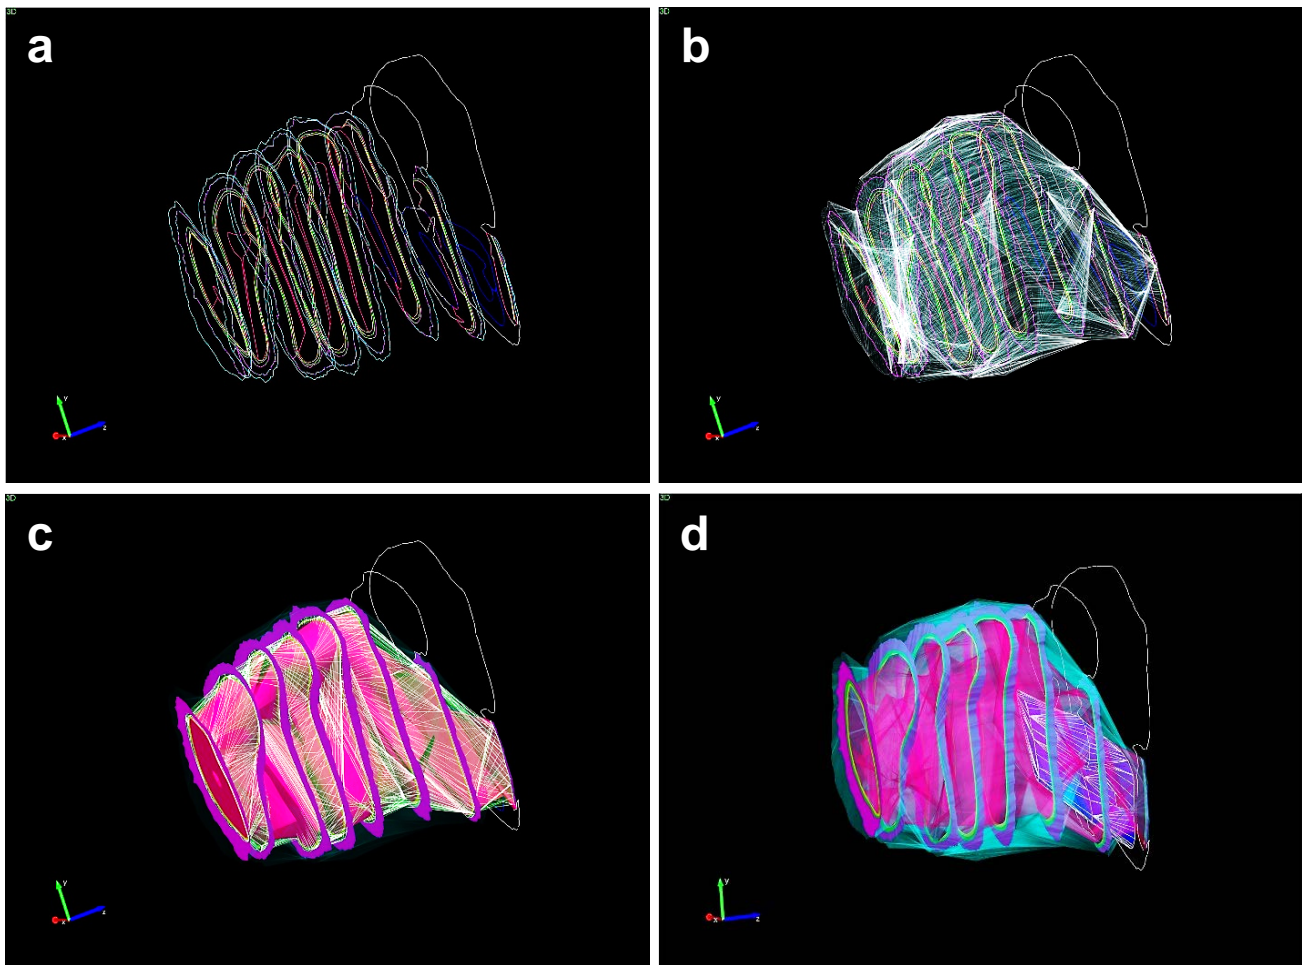

**Fig. S5** OB and AON volume 3D model. OB and AON volume 3D model. OB layers (GL: blue, EPL: violet, MiL: green, IPL: yellow and GrL: rose) and AON (dark blue) boundaries were traced using Stereo Investigator software (**a**). GL was marked by “blue shell surface” (**b**). EPL and IPL were marked by “flat surface” and MiL and GrL showed “shell appearance” (**c**). OB and AON 3D model (**d**). For abbreviations, see list.
