# Supplementary material for: Neurodegeneration and contralateral α-synuclein induction after intracerebral α-synuclein injections in the anterior olfactory nucleus of a Parkinson’s disease A53T mouse model
Source: PubMed Central journal article supplement (PMC6463651; doi:10.1186/s40478-019-0713-7), 2019-04-15
Supplement: 40478_2019_713_MOESM4_ESM.pdf [file 40478_2019_713_MOESM4_ESM.pdf]

## ADDITIONAL FILE 4

### **Neurodegeneration and contralateral $\alpha$ -synuclein induction after intracerebral $\alpha$ -synuclein injections in the anterior olfactory nucleus of a Parkinson's disease A53T mouse model**

Alicia Flores-Cuadrado<sup>1</sup>, Daniel Saiz-Sanchez<sup>1</sup>, Alicia Mohedano-Moriano<sup>2</sup>, Alino Martinez-Marcos<sup>1</sup>, Isabel Ubeda-Bañon<sup>1\*</sup>

<sup>1</sup>Neuroplasticity and Neurodegeneration Laboratory, CRIB, Ciudad Real Medical School, University of Castilla-La Mancha, Ciudad Real, Spain.

<sup>2</sup>School of Occupational Therapy, Speech Therapy and Nursing, University of Castilla-La Mancha, Talavera de la Reina, Spain.

[Alicia.flores@uclm.es](mailto:Alicia.flores@uclm.es)

[Daniel.saiz@uclm.es](mailto:Daniel.saiz@uclm.es)

[Alicia.mohedano@uclm.es](mailto:Alicia.mohedano@uclm.es)

[Alino.martinez@uclm.es](mailto:Alino.martinez@uclm.es)

#### **Address for correspondence:**

Isabel Ubeda-Bañon

University of Castilla-La Mancha

Ciudad Real Medical School

Camino de Moledores s/n

13071 Ciudad Real (Spain)

Phone: 926295300 6835

E-mail [Isabel.ubeda@uclm.es](mailto:Isabel.ubeda@uclm.es)

## Stereological $\alpha$ -synuclein, NeuN, Iba-1, GFAP quantification

**Table S8.** Statistical data of stereological  $\alpha$ -synuclein quantification.

| Area | Group (TG mice)                            | Comparisons (cells/mm <sup>3</sup> )       | t-test                 | P value       |
|------|--------------------------------------------|--------------------------------------------|------------------------|---------------|
| OB   | Saline-injection                           | Left hemisphere $\times$ Right hemisphere  | t <sub>6</sub> = 6.948 | P = 0.0004*** |
|      | $\alpha$ -syn-injection                    | Left hemisphere $\times$ Right hemisphere  | t <sub>4</sub> = 1.605 | P = 0.1838    |
|      | $\alpha$ -syn-injection x Saline-injection | Right hemisphere $\times$ Right hemisphere | t <sub>5</sub> = 2.080 | P = 0.0921    |
|      | $\alpha$ -syn-injection x Saline-injection | Left hemisphere $\times$ Left hemisphere   | t <sub>5</sub> = 3.805 | P = 0.0126*   |
| AON  | Saline-injection                           | Left hemisphere $\times$ Right hemisphere  | t <sub>6</sub> = 3.197 | P = 0.0187*   |
|      | $\alpha$ -syn-injection                    | Left hemisphere $\times$ Right hemisphere  | t <sub>4</sub> = 1.315 | P = 0.2588    |
|      | $\alpha$ -syn-injection x Saline-injection | Right hemisphere $\times$ Right hemisphere | t <sub>5</sub> = 2.310 | P = 0.0689    |
|      | $\alpha$ -syn-injection x Saline-injection | Left hemisphere $\times$ Left hemisphere   | t <sub>5</sub> = 2.104 | P = 0.0893    |
| Pir  | Saline-injection                           | Left hemisphere $\times$ Right hemisphere  | t <sub>6</sub> = 0.334 | P = 0.7493    |
|      | $\alpha$ -syn-injection                    | Left hemisphere $\times$ Right hemisphere  | t <sub>4</sub> = 0.115 | P = 0.9136    |
|      | $\alpha$ -syn-injection x Saline-injection | Right hemisphere $\times$ Right hemisphere | t <sub>5</sub> = 2.225 | P = 0.0767    |
|      | $\alpha$ -syn-injection x Saline-injection | Left hemisphere $\times$ Left hemisphere   | t <sub>5</sub> = 2.514 | P = 0.0536    |

**Table S9.** Statistical data of NeuN quantification (Mann-Whitney test).

| Area | Source of variation                 | P value     |
|------|-------------------------------------|-------------|
| OB   | WT-saline-RH x TG-saline-RH         | P = 0.0286* |
|      | WT-saline-LH x TG-saline-LH         | P = 0.0286* |
|      | WT- $\alpha$ -RH x TG- $\alpha$ -RH | P = 0.2286  |
|      | WT- $\alpha$ -LH x TG- $\alpha$ -LH | P = 0.1143  |
|      | TG-saline-RH x TG- $\alpha$ -RH     | P = 0.0571  |
|      | TG-saline-LH x TG- $\alpha$ -LH     | P = 0.0571  |
|      | WT-saline-RH x WT- $\alpha$ -RH     | P = 0.4857  |
|      | WT-saline-LH x WT- $\alpha$ -LH     | P = 0.1143  |
| AON  | WT-saline-RH x TG-saline-RH         | P = 0.0286* |
|      | WT-saline-LH x TG-saline-LH         | P = 0.0286* |
|      | WT- $\alpha$ -RH x TG- $\alpha$ -RH | P = 0.4000  |
|      | WT- $\alpha$ -LH x TG- $\alpha$ -LH | P = 0.0571  |
|      | TG-saline-RH x TG- $\alpha$ -RH     | P = 0.0571  |
|      | TG-saline-LH x TG- $\alpha$ -LH     | P = 0.0571  |
|      | WT-saline-RH x WT- $\alpha$ -RH     | P = 0.4857  |
|      | WT-saline-LH x WT- $\alpha$ -LH     | P = 0.8286  |
| Pir  | WT-saline-RH x TG-saline-RH         | P = 0.0286* |
|      | WT-saline-LH x TG-saline-LH         | P = 0.0286* |
|      | WT- $\alpha$ -RH x TG- $\alpha$ -RH | P > 0.9999  |
|      | WT- $\alpha$ -LH x TG- $\alpha$ -LH | P = 0.2286  |
|      | TG-saline-RH x TG- $\alpha$ -RH     | P = 0.0571  |
|      | TG-saline-LH x TG- $\alpha$ -LH     | P = 0.0571  |
|      | WT-saline-RH x WT- $\alpha$ -RH     | P = 0.0286* |
|      | WT-saline-LH x WT- $\alpha$ -LH     | P > 0.9999  |

**Table S10.** Statistical data of stereological Iba-1 quantification. Comparison of genotype in the right hemisphere.

| Area | Source of variation | F (DFn, DFd)        | P value         |
|------|---------------------|---------------------|-----------------|
| GL   | Interaction         | F (1, 11) = 0.04697 | P = 0.8324      |
|      | Treatment           | F (1, 11) = 1.256   | P = 0.2863      |
|      | Genotype            | F (1, 11) = 0.3596  | P = 0.5609      |
| EPL  | Interaction         | F (1, 11) = 0.06955 | P = 0.7969      |
|      | Treatment           | F (1, 11) = 1.053   | P = 0.3268      |
|      | Genotype            | F (1, 11) = 1.448   | P = 0.2541      |
| MiL  | Interaction         | F (1, 11) = 4.943   | P = 0.0481* (t) |
|      | Treatment           | F (1, 11) = 0.8695  | P = 0.3711      |
|      | Genotype            | F (1, 11) = 4.519   | P = 0.0570      |
| IPL  | Interaction         | F (1, 11) = 0.3797  | P = 0.5503      |
|      | Treatment           | F (1, 11) = 1.604   | P = 0.2315      |
|      | Genotype            | F (1, 11) = 0.02487 | P = 0.8775      |
| GrL  | Interaction         | F (1, 11) = 1.013   | P = 0.3358      |
|      | Treatment           | F (1, 11) = 3.076   | P = 0.1072      |
|      | Genotype            | F (1, 11) = 0.1085  | P = 0.7480      |
| AON  | Interaction         | F (1, 11) = 0.03820 | P = 0.8486      |
|      | Treatment           | F (1, 11) = 0.01318 | P = 0.9107      |
|      | Genotype            | F (1, 11) = 1.427   | P = 0.2573      |
| Pir  | Interaction         | F (1, 11) = 0.3274  | P = 0.5787      |
|      | Treatment           | F (1, 11) = 1.016   | P = 0.3351      |
|      | Genotype            | F (1, 11) = 0.03855 | P = 0.8479      |

(t) TG- $\alpha$ -right x TG-S-right:  $t_5 = 3.410$ ; P = 0.0190.

**Table S11.** Statistical data of stereological Iba-1 quantification. Comparison of genotype in the left hemisphere.

| Area | Source of variation | F (DFn, DFd)           | P value         |
|------|---------------------|------------------------|-----------------|
| GL   | Interaction         | F (1, 11) = 3.982      | P = 0.0714      |
|      | Treatment           | F (1, 11) = 0.1076     | P = 0.7490      |
|      | Genotype            | F (1, 11) = 0.05624    | P = 0.8169      |
| EPL  | Interaction         | F (1, 11) = 0.1320     | P = 0.7233      |
|      | Treatment           | F (1, 11) = 2.039      | P = 0.1811      |
|      | Genotype            | F (1, 11) = 1.927      | P = 0.1925      |
| MiL  | Interaction         | F (1, 11) = 3.576      | P = 0.0852 (t1) |
|      | Treatment           | F (1, 11) = 1.189      | P = 0.2989      |
|      | Genotype            | F (1, 11) = 0.7315     | P = 0.4106      |
| IPL  | Interaction         | F (1, 11) = 4.346e-005 | P = 0.9949      |
|      | Treatment           | F (1, 11) = 2.225      | P = 0.1639      |
|      | Genotype            | F (1, 11) = 0.2819     | P = 0.6060      |
| GrL  | Interaction         | F (1, 11) = 2.116      | P = 0.1737      |
|      | Treatment           | F (1, 11) = 0.004102   | P = 0.9501      |
|      | Genotype            | F (1, 11) = 0.3776     | P = 0.5514      |
| AON  | Interaction         | F (1, 11) = 0.7252     | P = 0.4126      |
|      | Treatment           | F (1, 11) = 0.2762     | P = 0.6096      |
|      | Genotype            | F (1, 11) = 0.002602   | P = 0.9602      |
| Pir  | Interaction         | F (1, 11) = 0.4845     | P = 0.5008      |
|      | Treatment           | F (1, 11) = 0.6570     | P = 0.4348 (t2) |
|      | Genotype            | F (1, 11) = 0.05178    | P = 0.8242      |

(t1) TG- $\alpha$ -left  $\times$  TG-S-left:  $t_5 = 3.626$ ; P = 0.0151.

(t2) TG- $\alpha$ -left  $\times$  TG-S-left:  $t_5 = 2.620$ ; P = 0.0471.

**Table S12.** Statistical data of stereological Iba-1 quantification. Comparison of hemispheres in WT.

| Area | Source of variation | F (DFn, DFd)         | P value        |
|------|---------------------|----------------------|----------------|
| GL   | Interaction         | F (3, 26) = 1.253    | P = 0.3108     |
|      | Treatment × Time    | F (3, 26) = 52.42    | P < 0.0001**** |
|      | Hemisphere          | F (1, 26) = 0.01173  | P = 0.9146     |
| EPL  | Interaction         | F (3, 26) = 1.470    | P = 0.2456     |
|      | Treatment × Time    | F (3, 26) = 82.29    | P < 0.0001**** |
|      | Hemisphere          | F (1, 26) = 0.2745   | P = 0.6047     |
| MiL  | Interaction         | F (3, 26) = 0.1273   | P = 0.9431     |
|      | Treatment × Time    | F (3, 26) = 39.19    | P < 0.0001**** |
|      | Hemisphere          | F (1, 26) = 0.1012   | P = 0.7530     |
| IPL  | Interaction         | F (3, 26) = 0.1904   | P = 0.9020     |
|      | Treatment × Time    | F (3, 26) = 36.83    | P < 0.0001**** |
|      | Hemisphere          | F (1, 26) = 0.05854  | P = 0.8107     |
| GrL  | Interaction         | F (3, 26) = 1.304    | P = 0.2944     |
|      | Treatment × Time    | F (3, 26) = 149.7    | P < 0.0001**** |
|      | Hemisphere          | F (1, 26) = 1.179    | P = 0.2876     |
| AON  | Interaction         | F (3, 26) = 1.304    | P = 0.2944     |
|      | Treatment × Time    | F (3, 26) = 149.7    | P < 0.0001**** |
|      | Hemisphere          | F (1, 26) = 1.179    | P = 0.2876     |
| Pir  | Interaction         | F (3, 26) = 0.06495  | P = 0.9779     |
|      | Treatment × Time    | F (3, 26) = 35.75    | P < 0.0001**** |
|      | Hemisphere          | F (1, 26) = 0.001407 | P = 0.9704     |

**Table S13.** Statistical data of stereological Iba-1 quantification. Comparison of hemispheres in TG.

| Area | Source of variation | F (DFn, DFd)         | P value         |
|------|---------------------|----------------------|-----------------|
| GL   | Interaction         | F (1, 10) = 0.1615   | P = 0.6962      |
|      | Treatment           | F (1, 10) = 2.842    | P = 0.1227      |
|      | Hemisphere          | F (1, 10) = 0.3787   | P = 0.5520      |
| EPL  | Interaction         | F (1, 10) = 1.320    | P = 0.2774      |
|      | Treatment           | F (1, 10) = 0.006174 | P = 0.9389      |
|      | Hemisphere          | F (1, 10) = 0.9160   | P = 0.3611      |
| MiL  | Interaction         | F (1, 10) = 0.1243   | P = 0.7318      |
|      | Treatment           | F (1, 10) = 24.35    | P = 0.0006***   |
|      | Hemisphere          | F (1, 10) = 3.098    | P = 0.1089      |
| IPL  | Interaction         | F (1, 10) = 0.08663  | P = 0.7745      |
|      | Treatment           | F (1, 10) = 1.997    | P = 0.1880      |
|      | Hemisphere          | F (1, 10) = 0.06282  | P = 0.8072      |
| GrL  | Interaction         | F (1, 10) = 0.3451   | P = 0.5699      |
|      | Treatment           | F (1, 10) = 3.261    | P = 0.1011      |
|      | Hemisphere          | F (1, 10) = 0.001080 | P = 0.9744      |
| AON  | Interaction         | F (1, 10) = 0.1234   | P = 0.7326      |
|      | Treatment           | F (1, 10) = 0.002316 | P = 0.9626      |
|      | Hemisphere          | F (1, 10) = 0.2034   | P = 0.6616      |
| Pir  | Interaction         | F (1, 10) = 7.081    | P = 0.0239* (t) |
|      | Treatment           | F (1, 10) = 0.007362 | P = 0.9333      |
|      | Hemisphere          | F (1, 10) = 0.07785  | P = 0.7859      |

(t) TG- $\alpha$ -left  $\times$  TG-S-left:  $t_5 = 2.620$ ; P = 0.0471.

**Table S14.** Statistical data of GFAP quantification. Comparison of genotype in the right hemisphere.

| Area | Source of variation | F (DFn, DFd)       | P value          |
|------|---------------------|--------------------|------------------|
| OB   | Interaction         | F (1, 11) = 0.2590 | P = 0.6208       |
|      | Treatment           | F (1, 11) = 0.6954 | P = 0.4221       |
|      | Genotype            | F (1, 11) = 32.13  | P = 0.0001***    |
| AON  | Interaction         | F (1, 11) = 1.121  | P = 0.3123       |
|      | Treatment           | F (1, 11) = 3.740  | P = 0.0793       |
|      | Genotype            | F (1, 11) = 11.73  | P = 0.0057** (t) |
| Pir  | Interaction         | F (1, 11) = 0.3859 | P = 0.5471       |
|      | Treatment           | F (1, 11) = 0.3573 | P = 0.5621       |
|      | Genotype            | F (1, 11) = 3.034  | P = 0.1094       |

(t) WT saline 2m-TG saline 2m:  $t_6 = 3.134$ ; P = 0.0202.

**Table S15.** Statistical data of GFAP quantification. Comparison of genotype in the left hemisphere.

| Area | Source of variation | F (DFn, DFd)        | P value       |
|------|---------------------|---------------------|---------------|
| OB   | Interaction         | F (1, 11) = 0.9921  | P = 0.3406    |
|      | Treatment           | F (1, 11) = 0.08698 | P = 0.7735    |
|      | Genotype            | F (1, 11) = 22.10   | P = 0.0006*** |
| AON  | Interaction         | F (1, 11) = 0.8663  | P = 0.3720    |
|      | Treatment           | F (1, 11) = 0.03401 | P = 0.8570    |
|      | Genotype            | F (1, 11) = 30.14   | P = 0.0002*** |
| Pir  | Interaction         | F (1, 11) = 1.283   | P = 0.2814    |
|      | Treatment           | F (1, 11) = 0.4568  | P = 0.5131    |
|      | Genotype            | F (1, 11) = 1.287   | P = 0.2807    |

**Table S16.** Statistical data of GFAP quantification. Comparison of hemispheres in WT.

| Area | Source of variation | F (DFn, DFd)        | P value     |
|------|---------------------|---------------------|-------------|
| OB   | Interaction         | F (3, 26) = 0.2841  | P = 0.8364  |
|      | Treatment           | F (3, 26) = 4.233   | P = 0.0146* |
|      | Hemisphere          | F (1, 26) = 1.315   | P = 0.2619  |
| AON  | Interaction         | F (3, 26) = 0.05543 | P = 0.9824  |
|      | Treatment           | F (3, 26) = 2.106   | P = 0.1239  |
|      | Hemisphere          | F (1, 26) = 0.5590  | P = 0.4614  |
| Pir  | Interaction         | F (3, 26) = 1.279   | P = 0.3024  |
|      | Treatment           | F (3, 26) = 2.273   | P = 0.1038  |
|      | Hemisphere          | F (1, 26) = 0.6240  | P = 0.4367  |

**Table S17.** Statistical data of GFAP quantification. Comparison of hemispheres in TG.

| Area | Source of variation | F (DFn, DFd)         | P value    |
|------|---------------------|----------------------|------------|
| OB   | Interaction         | F (1, 10) = 0.9984   | P = 0.3413 |
|      | Treatment           | F (1, 10) = 0.009101 | P = 0.9259 |
|      | Hemisphere          | F (1, 10) = 0.6813   | P = 0.4284 |
| AON  | Interaction         | F (1, 10) = 3.763    | P = 0.0811 |
|      | Treatment           | F (1, 10) = 2.085    | P = 0.1793 |
|      | Hemisphere          | F (1, 10) = 0.5549   | P = 0.4735 |
| Pir  | Interaction         | F (1, 10) = 0.03984  | P = 0.8458 |
|      | Treatment           | F (1, 10) = 1.002    | P = 0.3405 |
|      | Hemisphere          | F (1, 10) = 0.05028  | P = 0.8271 |

## 1.1 Supplementary Figures

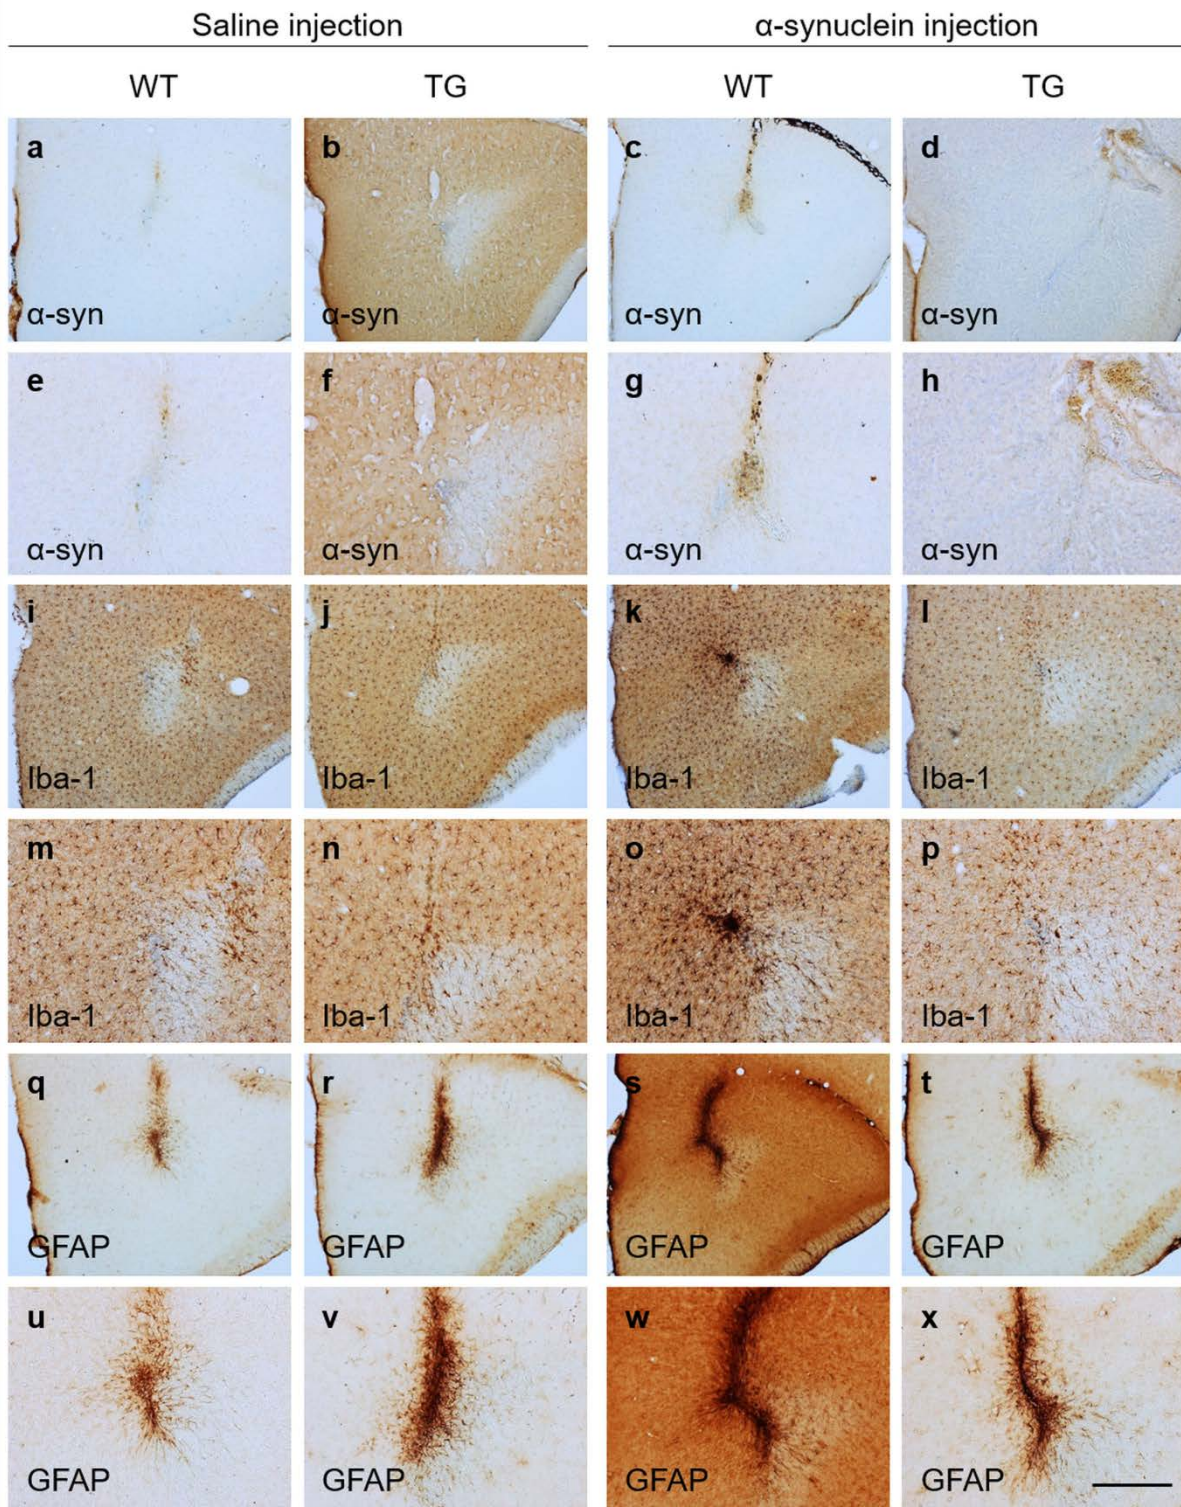

**Fig. S6** AON injection site labeled with different markers.  $\alpha$ -synuclein (**a-h**), Iba-1 (**i-p**) and GFAP (**q-x**). Scale bars: **a-d, i-l, q-t**, 500  $\mu$ m; **e-h, m-p, u-x** 250  $\mu$ m. For abbreviations, see list.



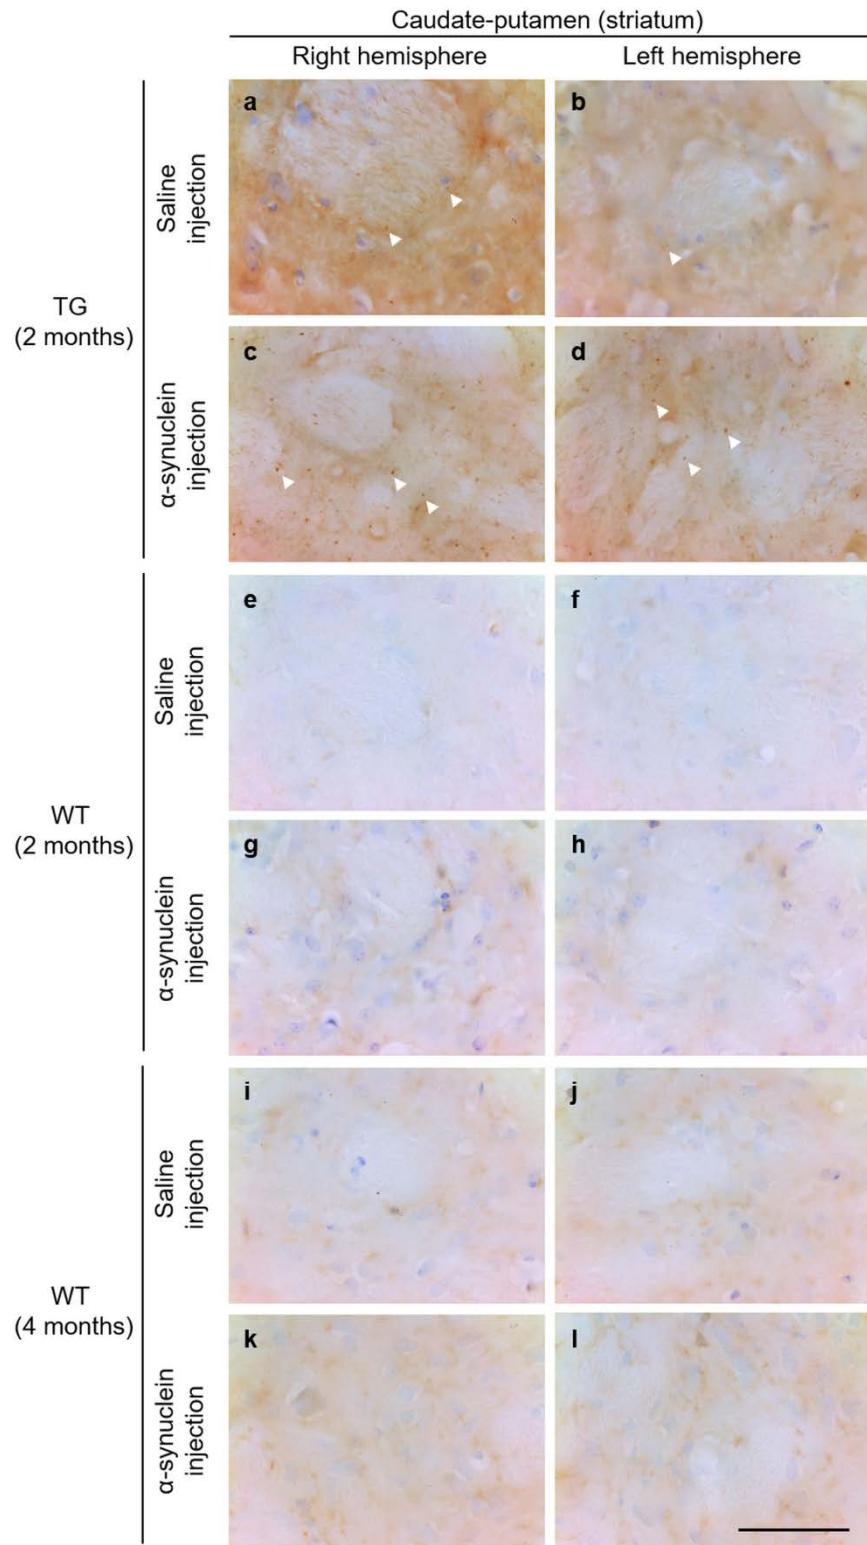

**Fig. S7**  $\alpha$ -synucleinopathy in the caudate-putamen (**a-l**). Arrows indicate  $\alpha$ -synuclein aggregates around striosomes (organization of afferent and efferent fibers in the striatum) (**a-d**). These aggregates were not found in saline-injected and  $\alpha$ -synuclein-injected WT animals (**e-l**). Scale bars: 50  $\mu$ m.

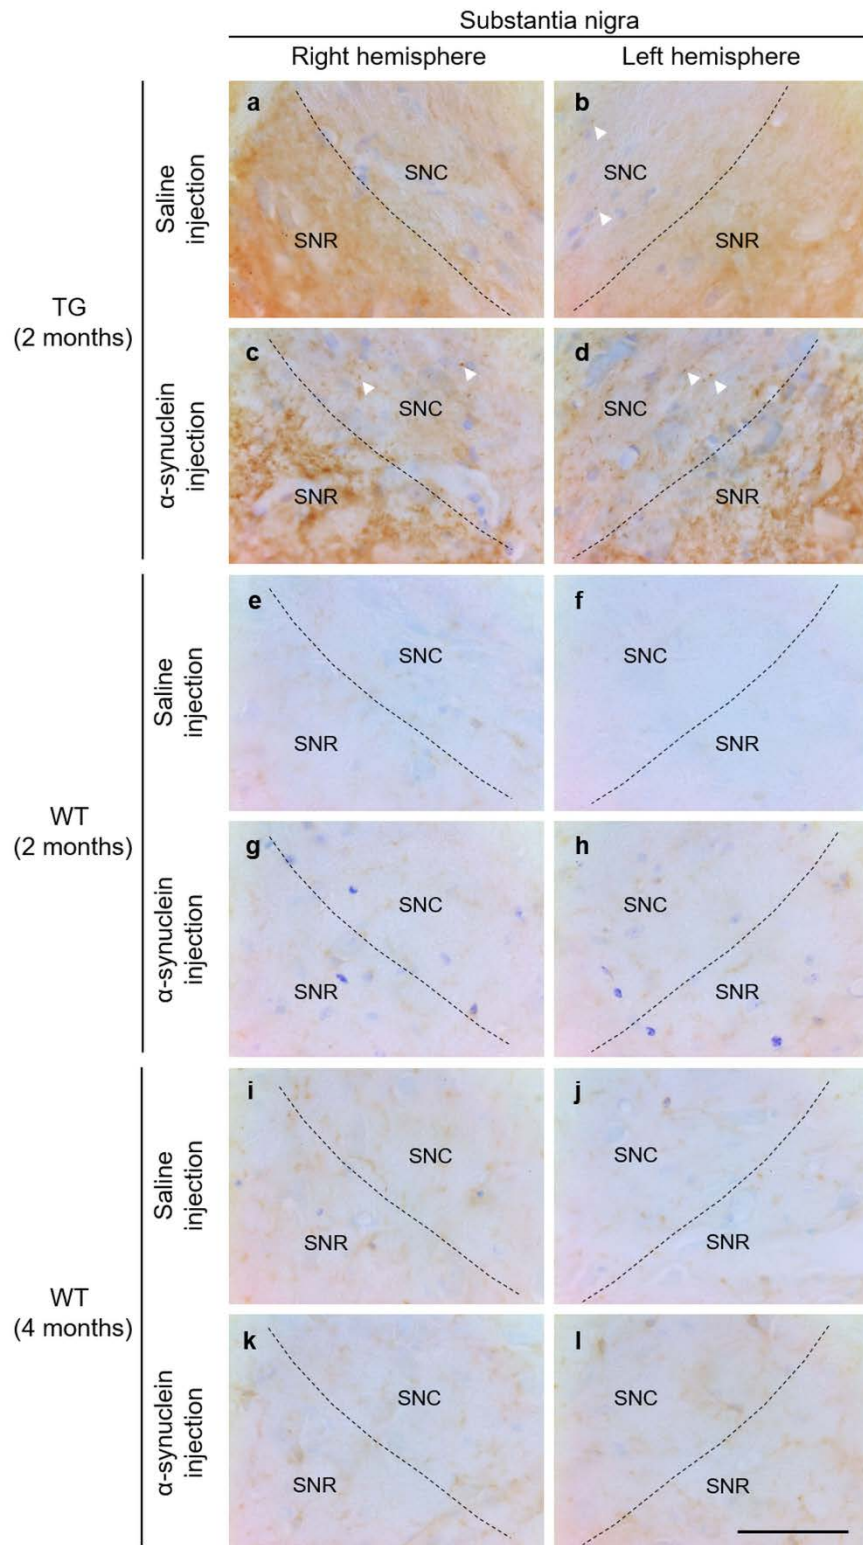

**Fig. S8**  $\alpha$ -synucleinopathy in the substantia nigra (a-l). Arrows indicate  $\alpha$ -synuclein aggregates, mainly in substantia nigra compact part (SNC) (a-d). These aggregates were not observed in saline-injected and  $\alpha$ -synuclein-injected WT animals (e-l). Scale bars: 50  $\mu$ m.
